April 2014

# PSYCHIATRIC SERVICES

A Journal of the  
American Psychiatric  
Association

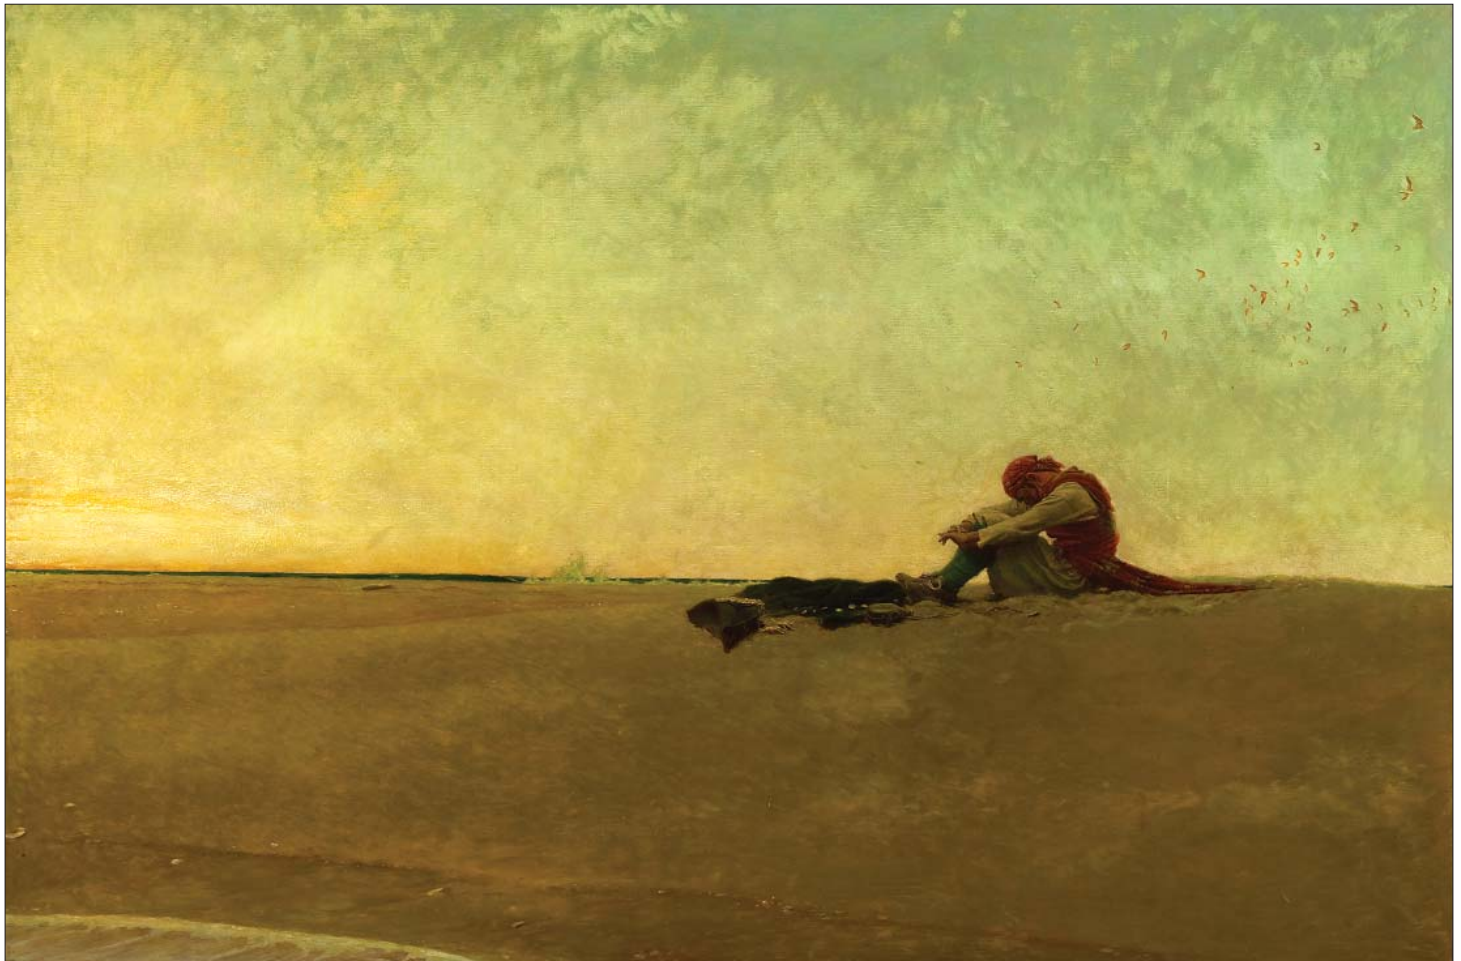

◆ Focus on Police Encounters:  
Three New Studies and  
a CIT Research Agenda

◆ Assessing the Evidence  
for Current Approaches  
to Peer Support Services

◆ Recovery Assessment Scale:  
Reliability and Validity of  
a Widely Used Measure
